# Supplementary material
Source: PubMed Central journal article supplement (PMC3025047)

**DNA binding - dependent glucocorticoid receptor activity promotes adipogenesis  
via krüppel-like factor 15 gene expression**

**Supplementary Figures Titles and Legends**

**Supplementary Figure 1 Effect of GR Antagonist RU486 on Adipogenic Marker Genes in MEFs.**

mRNA expression levels of adipogenic marker genes in MEFs treated under adipogenic conditions (AIM) with or without RU486 1 day after stimulation analyzed using quantitative RT-PCR. Data are mean  $\pm$  SEM; n=4. *P* values were determined by Steel-Dwass' test (\* *P*<0.05 vs Control, # *P*<0.05 vs AIM).

**Supplementary Figure 2 Induction of Adipocyte Differentiation in MEFs from GR<sup>null</sup> and GR<sup>dim</sup> Mice.**

MEFs derived from wild type, GR<sup>null</sup> and GR<sup>dim</sup> mice were differentiated into adipocytes and stained with Oil Red O for lipid droplets at 14 days post-induction. Macroscopic (a, b, c) and microscopic (d, e, f) views are shown.

**Supplementary Figure 3 Time Course of Expression Levels of Adipogenic-marker Genes in MEFs.**

Expression levels of adipogenic marker genes in MEFs were analyzed using quantitative RT-PCR at indicated time points. Data are mean  $\pm$  SEM; n=6.

Supplementary Figure 1.

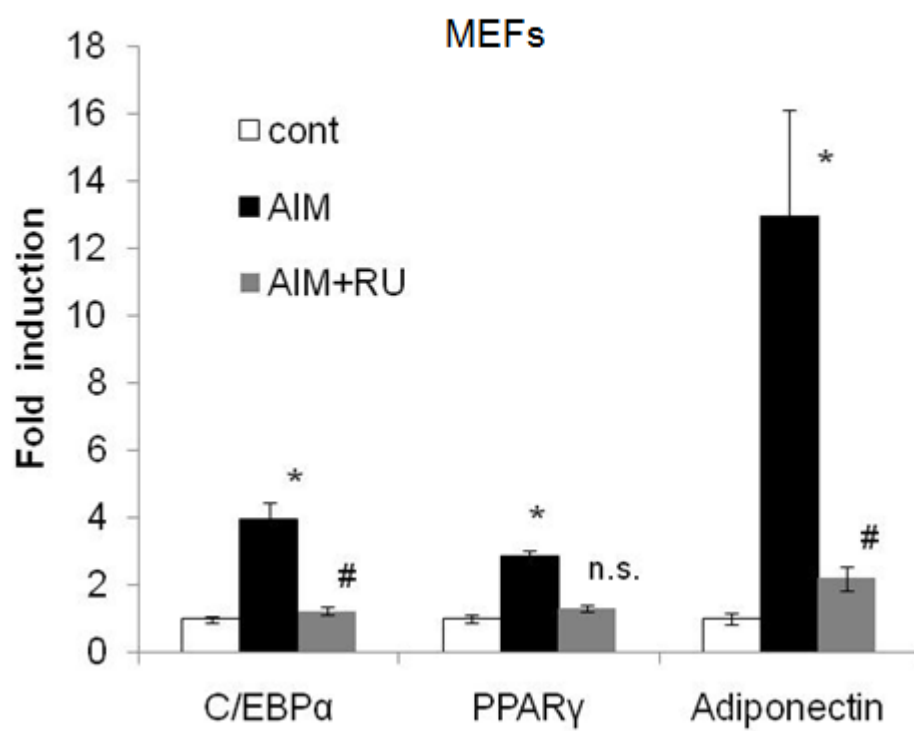

Supplementary Figure 2

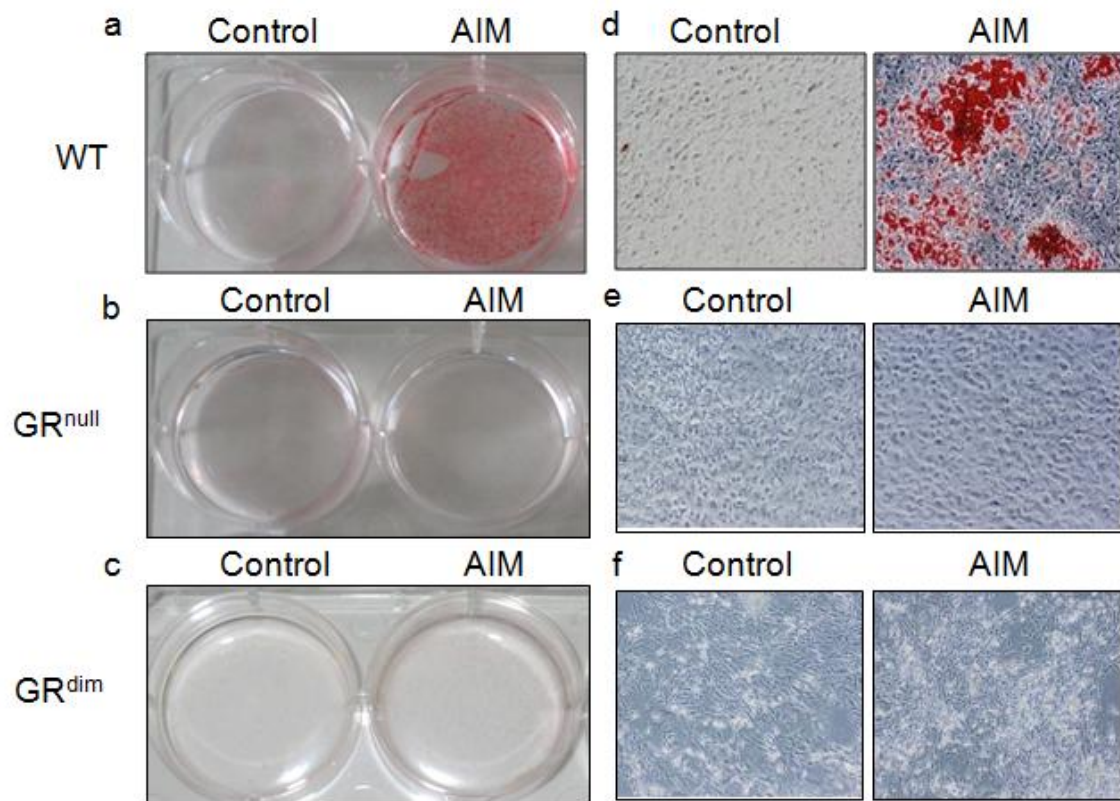

Supplementary Figure 3

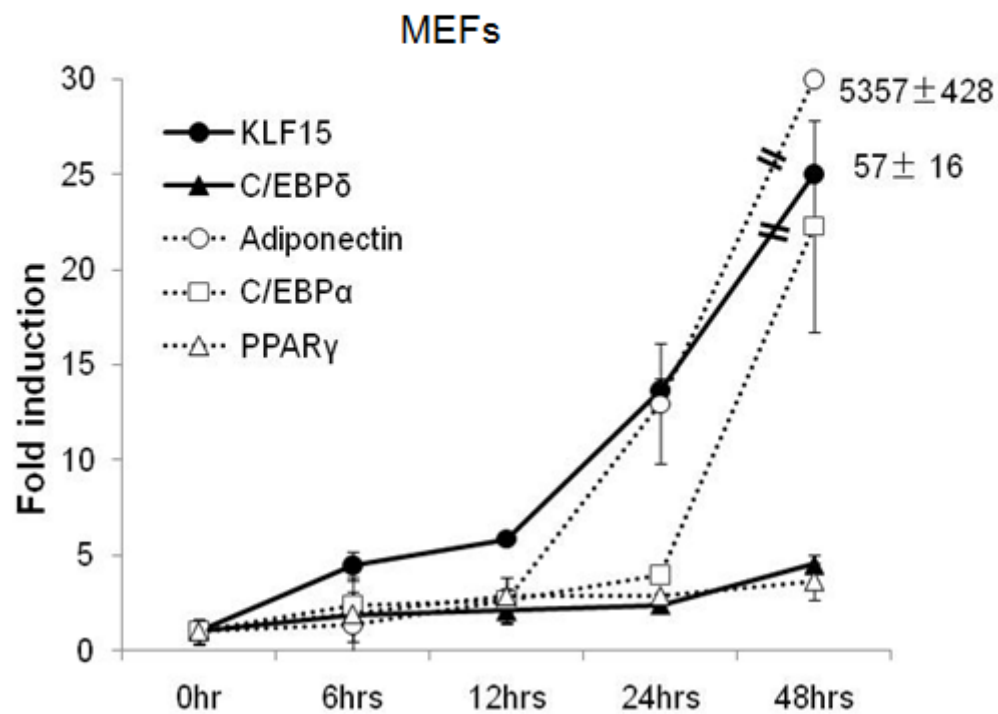

Supplement: NIHMS231462-supplement-1.pdf [file NIHMS231462-supplement-1.pdf]
